# Supplementary material for: Patterns of multimorbidity and their effects on adverse outcomes in rheumatoid arthritis: a study of 5658 UK Biobank participants
Source: HighWire-hosted journal article supplement (doi:10.1136/bmjopen-2020-038829), 2020-11-01

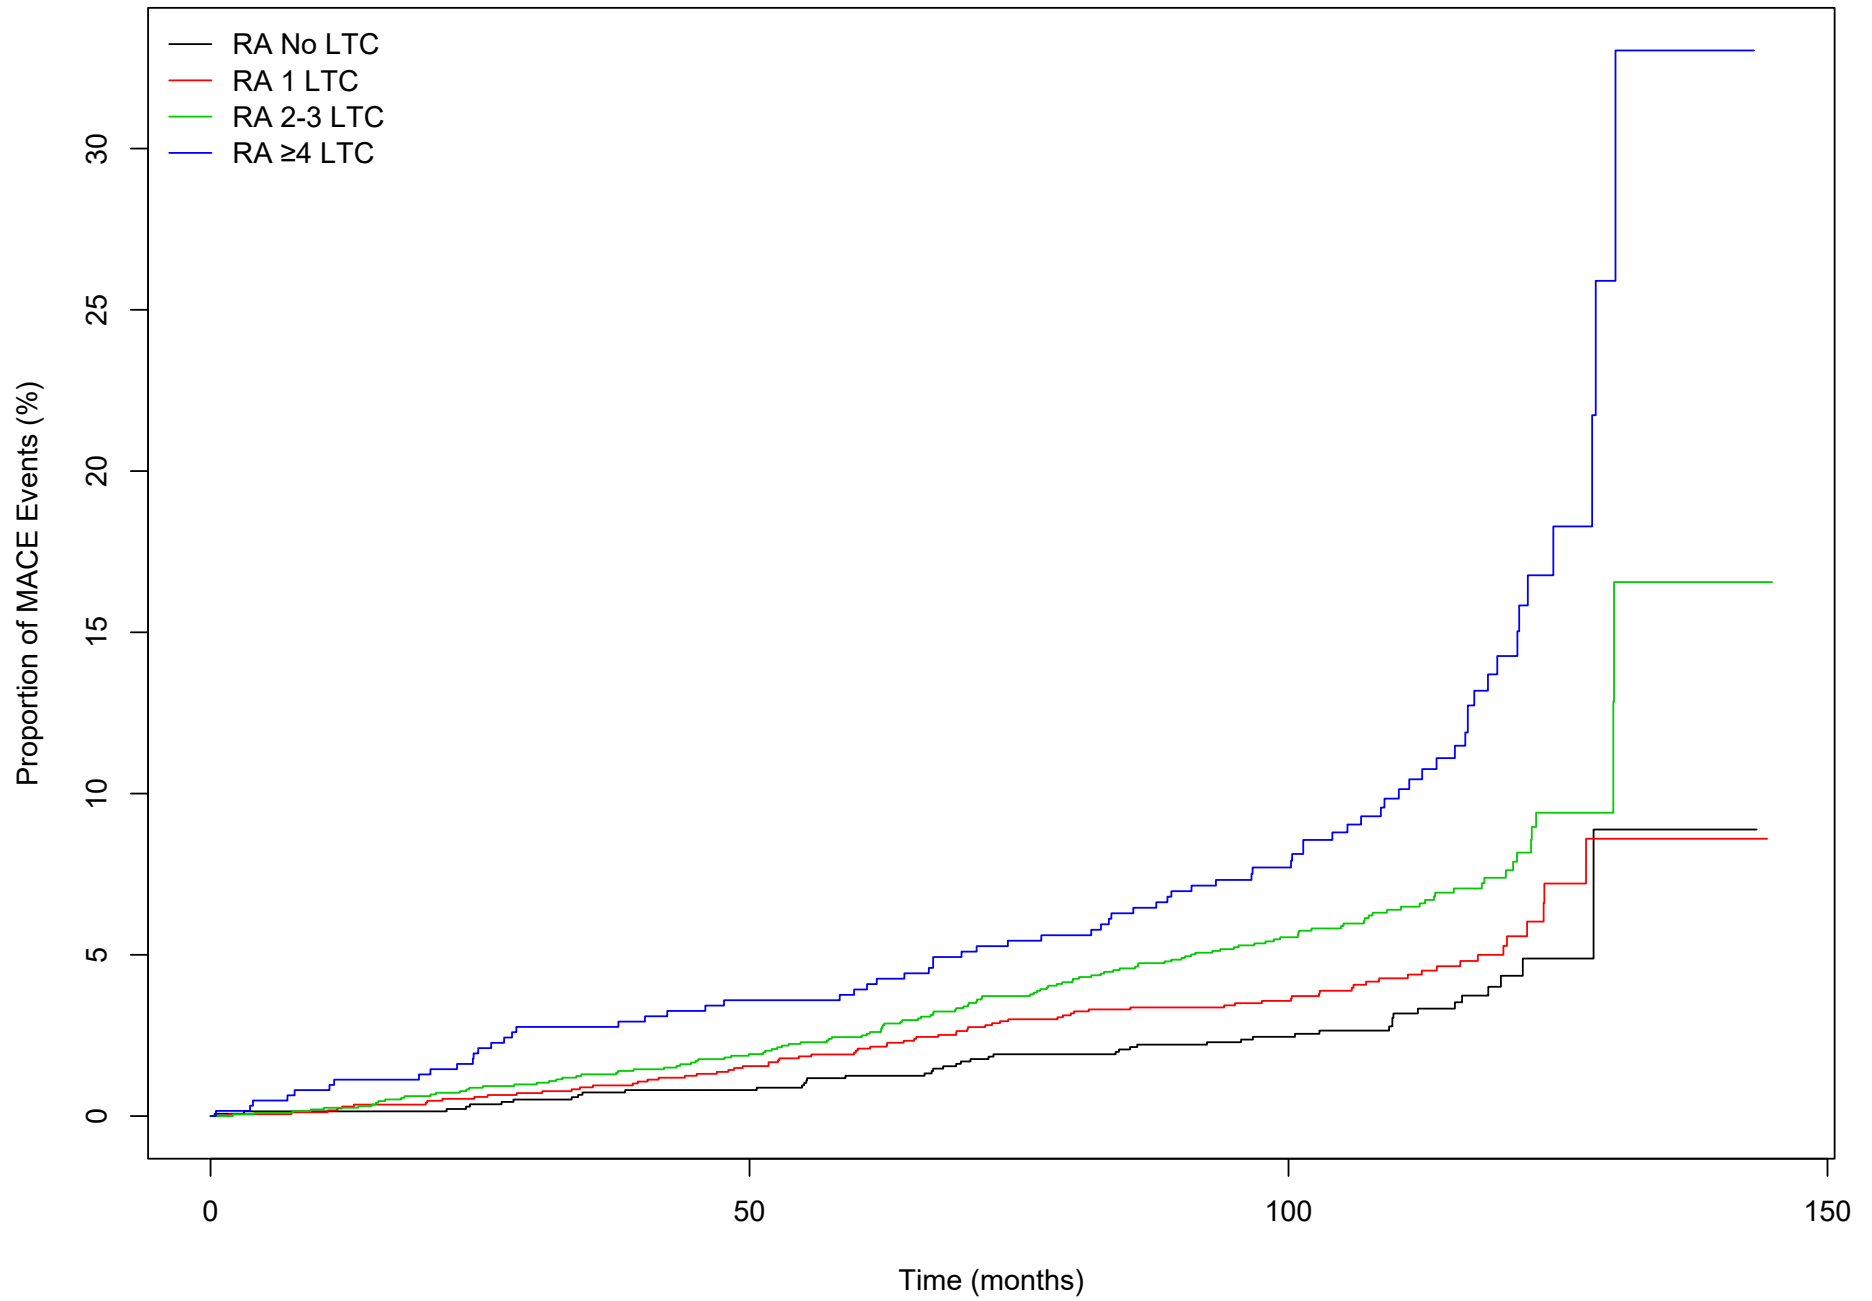

Supplement: bmjopen-2020-038829supp004_data_supplement.pdf [file bmjopen-2020-038829supp004_data_supplement.pdf]
